# Supplementary material
Source: HighWire-hosted journal article supplement (https://bmjopen.bmj.com/content/9/5/e023394)
Supplement: inline-supplementary-material-2 [file inline-supplementary-material-2.xlsx]

## Sheet:  282 registrations
DATABASE	Primary ID	Secondary ID/funds	Found in WHO search (Y/N)	Found in other registries search. (* when code is linked)	Nº Registrations - ICTRP not included.	A/B/C, see AI-AM	Sponsor	Country of Sponsor	Type of Institution /Sponsor	Funder at EU-CTRP	Collaborators - Sponsor always - CinicalTrials.gov	Funder at ISCTRN	Funder at ANZCTR	CONSISTENT-CTR	Funder type	FIG 3B - Funder General	Non-For-Profit Organizations	Status-geral	Started	Completed	Publication	Funding from Publication	FUNDER@PUBLICATION	Coherent (.C)/Not Coherent (NC)/ Additional Info (Add) - Publication VS databases	Journal	Year	Impact factor	IF Range	2 years +	Citations 2 years after publication	DOI
EU-CTR	2006-006130-17	NCT00646854	Y/Y - linked	Y/Y	2	B	Aarhus University Hospital (ClinicalTrials.gov)/Nordic Cancer Union(EU-CTR, Pt)	Denmark	University	n.i.	Aarhus University Hospital, GCP-unit at Aarhus University Hospital, Aarhus, Denmark	na	na	N	Industry+Disease Specific Organization	Both	DIS_SO	Completed	2007	2016	Yes	NA	not accessible	NC - Not Mentioned	Journal of Clinical Oncology	2012	20.982	11 to 60	2014	18	10.1200/JCO.2011.40.2719
ClinicalTrials.gov	NCT01204333		Y	Y	1		Academisch Medisch Centrum - Universiteit van Amsterdam (AMC-UvA)	The Netherlands	University						Disease Specific Organization	Non-for-profit organization	DIS_SO	Completed	2011	2016	Yes	Disease specific organisation	Dutch Heart Foundation	C	Journal of Stroke	2013	5.787	0 to 10	2015	6	10.1111/j.1747-4949.2011.00753.x
ClinicalTrials.gov	NCT02968186		Y	Y	1		Agrupamento de Centros de Saúde de Dão Lafões	Portugal	Hospital						Public Institution - University	Non-for-profit organization	NPO	On-going	2016
EU-CTR	2009-014612-34		N	Y	1		AIBILI	Portugal	Disease specific organization						Disease Specific Organization	Non-for-profit organization	DIS_SO	On-going	2011														SUPLEMENTARY INFORMATION 2		TABLE 1
EU-CTR	2013-001215-73		N	Y	1		AIBILI	Portugal	Disease specific organization						Disease Specific Organization	Non-for-profit organization	DIS_SO	Completed	2013	2013	No
EU-CTR	2013-001542-34		N	Y	1		AIBILI	Portugal	Disease specific organization						Disease Specific Organization	Non-for-profit organization	DIS_SO	Completed	2013	2014	No													Reference to Secondary ID		Nº Studies
EU-CTR	2009-014409-15	NCT01280929 - NOT@ICTRP	Y/N	Y/Y	2	B	AIBILI	Portugal	Disease specific organization	n.i	n.i.	na	na	Y	ni	Not indicated		Completed	2010	2013	Yes	Industry	Novartis	NC	Ophtalmologica	2016	1.742	0 to 10	2018	1	10.1159/000442026		A	Secondary ID referred in each registration		12
EU-CTR	2009-016760-36	NCT01281098 - NOT@ ICTRP	N/N	Y/Y	2	B	AIBILI	Portugal	Disease specific organization	n.i.	n.i.	na	na	Y	ni	Not indicated		Completed	2010	2012	No												B	Missing secondary ID in one of the registrations		23	47
EU-CTR	2014-003491-23	NCT02359526	Y/Y - not linked	Y/Y	2	C	AIBILI	Portugal	Disease specific organization	Alimera Sciences Limited	n.i.	na	na	N	Industry	For-Profit organization		On-going	2014														C	Missing secondary ID all registrations		12
EU-CTR	2015-001368-20	NCT02495181	Y/Y - not linked	Y/Y	2	C	AIBILI	Portugal	Disease specific organization	Bayer	EVICRNet	na	na	N	Industry + Disease Specific Organization	Both	DIS_SO	On-going	2015														Blank	Study Registered in One database		235
EU-CTR	2013-003490-10	NCT01975714	Y/N	Y/Y	2	C	AIBILI	Portugal	Disease specific organization	Allergan	EVICRNet	na	na	N	Industry	For-Profit organization		Completed	2013	2015	Yes	Disease specific organization	EVICRnet	NC	Graefes Arch Clin Exp Ophthalmol	2016	2.349	0 to 10	2018	not considered	10.1007/s00417-016-3299-9					Total	282
EU-CTR	2013-003640-23	NCT01941329	N/Y	Y/Y	2	C	AIBILI	Portugal	Disease specific organization	Novartis Pharma AG	EVICRNET	na	na	N	Industry	For-Profit organization		On-going	2014
ClinicalTrials.gov	NCT00264511	ACTRN12607000559415; NHMRC Project Grant 2008-2012	Y/N	Y/Y	2	B	Alfred Health Hospital	Australia	Hospital	na	NHMRC	na	NHMRC	Y	Government	Non-for-profit organization	I-FA	On-going	2006
ClinicalTrials.gov	NCT00882609		Y	Y	1		American College of Radiology - Image Metrix	USA	Disease specific organization						Disease Specific Organization	Non-for-profit organization	DIS_SO	Unkown	2009
EU-CTR	2004-004456-39	NCT00189553 - NOT @ICTRP	N/N	Y/N	2	B	ARCAGY	France	Disease specific organization	n.i.	Schering-Plough, ARCAGY; AGO Study Group; ANZGOG; EORTC; NCIC Clinical Trials Group; NSGO	na	na	N	ni	Not indicated		Completed	2005	2012	Yes	Industry	Schering-Plough, GlaxoSmithKline, Boehringer Ingelheim, AstraZeneca, Eli Lilly, Essex Pharma GmbH	Add	Journal of Clinical Oncology	2010	20.982	11 to 60	2012	29	10.1200/JCO.2009.25.7519
EU-CTR	2009-013869-26		N	Y	1		Associação para Desenvolvimento da Dermatologia do Hospital de Santa Maria	Portugal	Disease specific organization						ni	Not indicated		Completed	2009	2012	No
EU-CTR	2007-004632-24	NCT00852228	N/N	Y/Y	2	B	Association pour la Recherche sur le Temps Biologique et la Chronothérapie	France	Disease specific organization	n.i.	,Gustave Roussy, Cancer Campus, Grand Paris; Merck Serono International SA; Pfizer; CRESGE	na	na	N	Industry+Disease Specific Organization	Both	DIS_SO	On-going	2008
ISRCTN	ISRCTN45427977		Y	Y	1		AstraZeneca HealthCare Foundation (Portugal)	Portugal	Foundation						Industry Foundation	For-Profit organization		Completed	2012	2012	Yes	Industry grant	Astrazeneca Foundation - independence declared	C	BMC Medical Informatics and Decision Making	2017	2.042	0 to 10	2019	not considered	10.1186/s12911-017-0416-6
EU-CTR	2014-005181-30	NCT02513394	Y/Y - linked	Y/N*	2	B	Austrian Breast & Colorectal Cancer Study Group - ABCSG GmbH	Austria	Disease Specific Organization	Pfizer Inc.	Alliance Foundation Trials, LLC.;Austrian Breast & Colorectal Cancer Study Group; NSABP Foundation Inc; PrECOG, LLC.; Breast International Group; Pfizer	na	na	N	Industry	Both	DIS_SO	On-going	2015
ClinicalTrials.gov	NCT02102165		Y	Y	1		Breast International Group	Belgium	Disease specific organization						Foundation+Disease Specific Organization	Non-for-profit organization	DIS_SO	On-going	2014
EU-CTR	2011-005189-39	NCT01526369	Y/N	Y/Y	2	C	Cancer Trials Ireland	Ireland	Disease specific organization	GlaxoSmithKline	n.i.	na	na	N	Industry	For-Profit organization		Completed	2012	2015	No
EU-CTR	2015-003679-31	NCT02655315	N/Y	Y/Y	2	B	Centre Hospitalier Régional et Universitaire de Lille-H2020	France	University	EC-H2020	EC+ ApoPharma	na	na	N	European Commission+ Pharma Association	Non-for-profit organization	I-FA	On-going	2016
ClinicalTrials.gov	NCT02753192	FCT-ANR/NEU-SCC/0005/2012	Y	Y	1		Centre National de la Recherche Scientifique, France	France	Research Institute						FCT + ANR (Government Pt+Fr)	Non-for-profit organization	N-FA	On-going	2016
ClinicalTrials.gov	NCT01967290	PTDC/SAU-NEU/102075/2008_SWORD	Y	Y	1		Centro Hospitalar de Entre o Douro e Vouga	Portugal	Hospital						FCT	Non-for-profit organization	N-FA	Completed	2013	2013	Yes	Public grants	COMPETE, FCT	C	Scientific Reports	2014	5.228	0 to 10	2016	1	10.1038/srep05670
EU-CTR	2014-001013-81		Y	Y	1		Centro Hospitalar de São João	Portugal	Hospital						Public Institution - Hospital	Non-for-profit organization	NPO	On-going	2014
EU-CTR	2012-005226-29		N	Y	1		Centro Hospitalar de São João	Portugal	Hospital						Public Institution - Hospital	Non-for-profit organization	IPO	On-going	2014
ClinicalTrials.gov	NCT01560741		Y	Y	1		Centro Hospitalar de São João	Portugal	Hospital						Public Institution - Hospital	Sponsor	NPO	Unkown	2012
ClinicalTrials.gov	NCT03015428		Y	Y	1		Centro Hospitalar de São João	Portugal	Hospital						Public Institution - Hospital	Sponsor	NPO	Completed	2015	2016	Yes	NA	not accessible	C - Not Mentioned	Porto Biomedical Journal	2017	NA	NA	2019	not considered	10.1016/j.pbj.2017.04.003
ClinicalTrials.gov	NCT01424202		Y	Y	1		Centro Hospitalar de São João	Portugal	Hospital						Public Institution - Hospital	Sponsor	NPO	Completed	2008	2010	Yes	NA	not accessible	C - Not Mentioned	Critical Care	2012	1.122	0 to 10	2014	2	10.1186/cc11249
ClinicalTrials.gov	NCT01523912		Y	Y	1		Centro Hospitalar de São João	Portugal	Hospital						Public Institution - Hospital	Sponsor	NPO	Completed	2011	2015	Yes	NA	not indicated	C - Not Mentioned	European Journal of Gastroenterology & Hepatology	2013	1.968	0 to 10	2015	1	10.1097/MEG.0b013e32835f8fa5
ISRCTN	ISRCTN53984585		Y	Y	1		Centro Hospitalar de São João	Portugal	Hospital						Disease Specific Organizations; Public Institution - Hospital	Non-for-profit organization	NPO	Completed	2014	2015	No
ClinicalTrials.gov	NCT00840788		Y	Y	1		Centro Hospitalar de São João	Portugal	Hospital						Public Institution - Hospital + University	Non-for-profit organization	NPO	Completed	2005	2007	No
ClinicalTrials.gov	NCT02167542		Y	Y	1		Centro Hospitalar de São João	Portugal	Hospital						Public Institution - Hospital	Sponsor	NPO	Completed	2010	2014	No
ClinicalTrials.gov	NCT02253667		Y	Y	1		Centro Hospitalar de São João	Portugal	Hospital						Public Institution - Hospital	Sponsor	NPO	Completed	2014	2015	No
ClinicalTrials.gov	NCT02484651 - NOTF@ICTRP	2014-005238-76	N/Y	Y/N	2	B	Centro Hospitalar do Porto	Portugal	Hospital	MSD	MSD	na	na	Y	Industry	For-Profit organization		On-going	2016
ClinicalTrials.gov	NCT02297828		Y	Y	1		Centro Hospitalar do Porto	Portugal	Hospital						Public Institution - Hospital	Sponsor	NPO	Completed	2014	2014	Yes	No external funding	No external funding	Add	Journal of Clinical Anesthesia	2016	1.284	0 to 10	2018	not considered	10.1016/j.jclinane.2016.06.024
ClinicalTrials.gov	NCT01337115		Y	Y	1		Centro Hospitalar do Porto	Portugal	Hospital						Public Institution - University	Non-for-profit organization	NPO	Completed	2011	2012	Yes	NA	No funding	NC - Not Mentioned	Open Journal of Anesthesiology	2012	NA	NA	2014	1	10.4236/ojanes.2012.24025
ClinicalTrials.gov	NCT02406300		Y	Y	1		Centro Hospitalar do Porto	Portugal	Hospital						Public Institution - Hospital+University	Non-for-profit organization	NPO	Unkown	2015
ClinicalTrials.gov	NCT02436694		Y	Y	1		Centro Hospitalar do Porto	Portugal	Hospital						Public Institution - Hospital	Sponsor	NPO	On-going	2015
ClinicalTrials.gov	NCT02164825	Mariana Marques da Cunha, MD,	Y	Y	1		Centro Hospitalar do Tâmega e Sousa	Portugal	Hospital						Public Institution - Hospital	Sponsor	NPO	Completed	2014	2014	No
ClinicalTrials.gov	NCT02985086		Y	Y	1		Centro Hospitalar Lisboa Norte	Portugal	Hospital						Public Institution - Hospital	Sponsor	NPO	On-going	2013
ClinicalTrials.gov	NCT01633294		Y	Y	1		Centro Hospitalar Lisboa Norte	Portugal	Hospital						Public Institution - Hospital	Sponsor	NPO	Completed	2008	2012	Yes	NA	not accessible	C - Not Mentioned	Obstetrics & Gynecology	2012	5.426	0 to 10	2014	1	10.1097/AOG.0b013e31826e46bc.
ClinicalTrials.gov	NCT02842879		Y	Y	1		Centro Hospitalar Lisboa Norte	Portugal	Hospital						Public Institution - Hospital	Sponsor	NPO	Completed	2014	2015	Yes	NA	not accessible	C - Not Mentioned	European Journal of Obstetrics & Gynecology and Reproductive Biology	2016	1.666	0 to 10	2018	not considered	10.1016/j.ejogrb.2016.11.026
ClinicalTrials.gov	NCT01752140		Y	Y	1		Centro Hospitalar Lisboa Norte	Portugal	Hospital						Public Institution - Hospital	Sponsor	NPO	Completed	2009	2010	No
ClinicalTrials.gov	NCT02460185		Y	Y	1		Centro Hospitalar Lisboa Norte	Portugal	Hospital						Public Institution - Hospital	Sponsor	NPO	Completed	2015	2016	No
ClinicalTrials.gov	NCT01904474	PTDC/DTP-PIC/0769/2012	Y	Y	1		Centro Hospitalar Lisboa Norte	Portugal	Hospital						FCT + Public Institution- Polytechnic	Non-for-profit organization	N-FA	Completed	2013	2015	No
ClinicalTrials.gov	NCT02396017		Y	Y	1		Centro Hospitalar Lisboa Ocidental	Portugal	Hospital						Public Institution - Hospital	Sponsor	NPO	Unkown	2015
ClinicalTrials.gov	NCT02022124		Y	Y	1		Centro Hospitalar Lisboa Ocidental	Portugal	Hospital						Public Institution - Hospital	Sponsor	NPO	Completed	2013	2015	No
ClinicalTrials.gov	NCT02400229	DISCHARGE - EC-GA 603266 ( Other Grant/Funding Number: European Commission )	Y	Y	1		Charite University, Berlin, Germany	Germany	University						European Commission	Non-for-profit organization	I-FA	On-going	2015
EU-CTR	2012-003314-13		N	Y	1		Cliniques Universitaires Saint Luc, Université catholique de Louvain	Belgium	University						Public Institution - Hospital	Non-for-profit organization	IPO	On-going	2013
ISRCTN	ISRCTN44013133*	NCT00389181; ARUBA Trial	Y/Y - linked	Y/N*	2	B	Columbia University	USA	University	na	NINDS	NINDS	na	Y	Government - USA (NIH)	Non-for-profit organization	I-FA	Completed	2006	2014	Yes	Disease specific organisation+Academic grant	NINDS(NIH)	C	The Lancet	2014	44.002	11 to 60	2016	35	10.1016/S0140-6736(13)62302-8.
ClinicalTrials.gov	NCT02682368		Y	Y	1		Connolly Hospital Blanchardstown	Ireland	Hospital						Disease Specific Organization	Non-for-profit organization	DIS_SO	On-going	2016
EU-CTR	2005-004599-19		N	Y	1		Dutch Childhood Oncology Group	The Netherlands	Disease specific organization						Disease Specific Organization	Non-for-profit organization	DIS_SO	On-going	2005
EU-CTR	2011-006342-32	NCT01597414	Y/Y - linked	Y/Y	2	A	EORTC	Belgium	Disease specific organization	Roche& EORTC	Roche & EORTC	na	na	Y	Industry	For-Profit organization		On-going	2013
ClinicalTrials.gov	NCT00085228		Y	Y	1		EORTC	Belgium	Disease specific organization						Industry	For-Profit organization		Completed	2004	2006	Yes	Industry	Genta Incorporated and Sanofi-Aventis	C	Annals of Oncology	2009	11.855	11 to 60	2011	9	10.1093/annonc/mdn784
EU-CTR	2005-002625-31		Y	Y	1		EORTC	Belgium	Disease specific organization						Industry+ Disease Specific Organization	Both	DIS_SO	On-going	2006
ISRCTN	ISRCTN67331344		Y	Y	1		EORTC	Belgium	Disease specific organization						Disease Specific Organization	Non-for-profit organization	DIS_SO	Completed	2004	2006	Yes	Disease specific organisation	EORTC	C	NEJM	2010	59.558	11 to 60	2012	28	10.1056/NEJMoa0908806
EU-CTR	2009-010273-20	NCT01502696	Y/Y - linked	Y/Y	2	A	EORTC	Belgium	Disease specific organization	MERCK and Co. Inc	NCIC Clinical Trials Group	na	na	N	Industry	Both	DIS_SO	On-going	2012
EU-CTR	2014-000722-38	NCT02205047	Y/Y - linked	Y/Y	2	A	EORTC	Belgium	Disease specific organization	EORTC, F. Hoffmann-La Roche	n.i.	na	na	N	Industry+ Disease Specific Organization	Both	DIS_SO	On-going	2015
EU-CTR	2014-001486-27	NCT02172872	Y/Y - linked	Y/Y	2	A	EORTC	Belgium	Disease specific organization	Janssen Pharmaceutica NV; EORTC	Gruppo Italiano Malattie EMatologiche dell'Adulto; Janssen	na	na	N	Industry+ Disease Specific Organization	Both	DIS_SO	On-going	2015
EU-CTR	2004-002714-11	NCT00182819, ACTRN12607000427471	N/N/N	Y/Y/Y	3	B	EORTC	Belgium	Disease specific organization	n.i.	NCIC Clinical Trials Group; British Medical Research Council; Trans-Tasman Radiation Oncology Group (TROG)	na	EORTC	N	Government+ Disease Specific Organization	Non-for-profit organization	I-FA	On-going	2005
EU-CTR	2009-011580-36	NCT01123473	Y/Y - linked	Y/Y	2	B	EORTC	Belgium	Disease specific organization	n.i.	n.i.	na	na	N	Industry	For-Profit organization		Completed	2011	2014	No
ClinicalTrials.gov	NCT01709357		Y	Y	1		Escola Superior de Tecnologia da Saúde do Porto	Portugal	University						Public institution-University	Sponsor	NPO	Completed	2011	2012	Yes	NA	no funding	C - Not Mentioned	Journal of Manipulative and Physiological Therapeutics	2013	1.592	0 to 10	2015	5	10.1016/j.jmpt.2013.04.008
ClinicalTrials.gov	NCT01853761		Y	Y	1		Escola Superior de Tecnologia da Saúde do Porto	Portugal	University						Public institution-University	Sponsor	NPO	Completed	2011	2011	Yes	NA	no funding	C - Not Mentioned	THE JOURNAL OF ALTERNATIVE AND COMPLEMENTARY MEDICINE	2015	1.622	0 to 10	2017	0	10.1089/acm.2014.0114
ClinicalTrials.gov	NCT01887080		Y	Y	1		Escola Superior de Tecnologia da Saúde do Porto	Portugal	University						Public institution-University	Sponsor	NPO	Completed	2012	2013	Yes	NA	no funding	C - Not Mentioned	Heart, Lung and Circulation	2017	1.575	0 to 10	2019	not considered	10.1016/j.hlc.2016.08.004
ClinicalTrials.gov	NCT02390336		N	Y	1		Escola Superior de Tecnologia da Saúde do Porto	Portugal	University						Public institution-University	Sponsor	NPO	Completed	2015	2015	Yes	NA	no funding	C - Not Mentioned	Manual Therapy	2016	1.869	0 to 10	2018	not considered	10.1016/j.math.2015.10.007
ClinicalTrials.gov	NCT02110927		Y	Y	1		Escola Superior de Tecnologia da Saúde do Porto	Portugal	University						Public institution-University	Sponsor	NPO	Completed	2014	2014	No
ClinicalTrials.gov	NCT00091312		Y	Y	1		Federation Francophone de Cancerologie Digestive	France	Disease specific organization						Disease Specific Organization	Non-for-profit organization	DIS_SO	Unkown	2004
EU-CTR	2005-003463-23		N	Y	1		Fédération Francophone de Cancérologie Digestive (FFCD)	France	Disease specific organization						ni	Not indicated		Completed	2006	2016	Yes	(BOTH) Disease specific organisation+Industry	Fédération Francophone de Cancérologie Digestive (FFCD), Merck KGaA, and Sanofi -Aventis.	Add	The Lancet Oncology	2014	26.509	11 to 60	2016	15	10.1016/S1470-2045(14)70227-X
EU-CTR	2009-011186-88		Y	Y	1		FONDAZIONE CENTRO EMOFILIA E TROMBOSI ANGELO BIANCHI BONOMI	Italy	Foundation						ni	Not indicated		Completed	2009	na	Yes	Disease specific organisation	Angelo Bianchi Bonomi Foundation and others	Add	NEJM	2016	59.558	11 to 60	2018	not considered	10.1056/NEJMoa1516437.
ClinicalTrials.gov	NCT02869399		Y	Y	1		Fondazione IRCCS Istituto Nazionale dei Tumori, Milano	Italy	Foundation						Disease Specific Organization	Non-for-profit organization	DIS_SO	On-going	2015
ClinicalTrials.gov	NCT02354313	2009-012807-25	N/N	Y/Y	2	B	Fondazione Italiana Linfomi ONLUS	Italy	Foundation	n.i.	n.i.	na	na	N	Disease Specific Organization	Non-for-profit organization	DIS_SO	On-going	2010
ISRCTN	ISRCTN86043495		Y	Y	1		Fondazione Michelangelo (Italy)	Italy	Foundation						Industry	For-Profit organization		Completed	2004	2005	Yes	Industry	F Hoff mann-La Roche.	C	The Lancet	2010	44.002	11 to 60	2012	40	10.1016/S0140-6736(09)61964-4
EU-CTR	2013-001476-37*	ISRCTN11193709, NCT02383108	N/N/N	Y/Y*/N*	3	A	Fondazione PENTA ONLUS	Italy	Foundation	Fondazione PENTA ONLUS; Gilead; Janssen-Cilag; ViiV Healthcare Ltd	n.i.	PENTA Foundation (Italy)	na	N	Industry+ Foundation	Both	IPO	On-going	2015
ClinicalTrials.gov	NCT02570919	PROSINT-IGRT A(1)	Y	Y	1		Fundacao Champalimaud	Portugal	Foundation						Foundation	Sponsor	OTHERS	On-going	2015
ClinicalTrials.gov	NCT02761889	HYPO	Y	Y	1		Fundacao Champalimaud	Portugal	Foundation						Foundation	Sponsor	OTHERS	On-going	2016
ClinicalTrials.gov	NCT02976402		Y	Y	1		Fundacao Champalimaud	Portugal	Foundation						Foundation	Sponsor	OTHERS	On-going	2016
ClinicalTrials.gov	NCT01803919	ESCALE	Y	Y	1		Fundació Institut de Recerca de l'Hospital de la Santa Creu i Sant Pau	Spain	Foundation						European Commission	Non-for-profit organization	I-FA	Completed	2012	2016	Yes	Foundation (2013) + ECRIN funding (2015)	ECRIN, Associacion Colaboracion Cochrane Iberoamericana, FP7	Add	BMC Urology	2013	1.606	0 to 10	2015	1	10.1186/1471-2490-13-38
EU-CTR	2004-001286-17		N	Y	1		Fundación Española de Esclerosis Múltiple (FEDEM)	Spain	Foundation						ni	Not indicated		On-going	2006
EU-CTR	2007-000649-36		N	Y	1		Fundación PETHEMA	Spain	Foundation						ni	Not indicated		On-going	2007
EU-CTR	2009-013890-16		N	Y	1		GEDII - Grupo de Estudo da Doença inflamatória Intestinal	Portugal	Disease specific organization						ni	Not indicated		Completed	2010	2012	Yes	Industry	Merck Sharp & Dohme Portugal	Add	Journal of Crohn's and Colitis	2016	6.585	0 to 10	2018	not considered	10.1093/ecco-jcc/jjw112
EU-CTR	2009-017995-26		N	Y	1		GELARC	France	Disease specific organization						ni	Not indicated		On-going	2010
EU-CTR	2007-003815-30		N	Y	1		GETECCU (Grupo Español de Trabajo en Enfermedad de Crohn y Colitis Ulcerosa)	Spain	Disease specific organization						ni	Not indicated		Completed	2007	2013	No
EU-CTR	2007-001519-52		N	Y	1		Groupe d'Etudes des Lymphomes de l'Adult	France	Disease specific organization						ni	Not indicated		Completed	2007	2012	Yes	BOTH) Disease specific organisation+Industry	Groupe d’Etude des Lymphomes de l’Adulte (GELA), Amgen	Add	The Lancet Oncology	2013	26.509	11 to 60	2015	19	10.1016/S1470-2045(13)70122-0
ClinicalTrials.gov	NCT01408810		Y	Y	1		Grupo de Estudo da Doença Inflamatória Intestinal	Portugal	Disease specific organization						Disease Specific Org	Sponsor	DIS_SO	Completed	2011	2012	No
EU-CTR	2011-000877-29		N	Y	1		Grupo de Estudos Oncológicos	Portugal	Disease specific organization						Industry	For-Profit organization		On-going	2011
ClinicalTrials.gov	NCT00215722		Y	Y	1		Grupo de Investigação do Cancro Digestivo	Portugal	Disease specific organization						Disease Specific Org	Sponsor	DIS_SO	Unkown	2005
EU-CTR	2008-008282-36		N	Y	1		Grupo de Investigação do Cancro Digestivo	Portugal	Disease specific organization						ni	Not indicated		Completed	2010	na	No
ClinicalTrials.gov	NCT01836744		Y	Y	1		Grupo de Investigação: Cirurgia Oral, Peridontologia, Implantologia	Portugal	Disease specific organization						Industry + Public Institution- University	Both	NPO	On-going	2013
EU-CTR	2008-008922-55		Y	Y	1		Grupo Español de Investigación en Sarcomas	Spain	Disease specific organization						ni	Not indicated		On-going	2009
ClinicalTrials.gov	NCT00702611		Y	Y	1		Grupo Espanol de Trabajo en Enfermedad de Crohn y Colitis Ulcerosa	Spain	Disease specific organization						Disease Specific Organization	Non-for-profit organization	DIS_SO	Completed	2008	2013	No
ClinicalTrials.gov	NCT02024061	PTDC/DES/113591/2009	Y	Y	1		Grupo Lusófona	Portugal	University						FCT	Non-for-profit organization	N-FA	Unkown	2012
ClinicalTrials.gov	NCT00147004		Y	Y	1		Hadassah Medical Organization	Israel	University						Disease Specific Organizations; Public Institution - Hospital	Non-for-profit organization	DIS_SO	Completed	2004	2005	Yes	EC+Associations		Add	NEJM	2008	59.558	11 to 60	2010	100	10.1056/NEJMoa071366
EU-CTR	2011-006056-37		N	Y	1		Hamilton Health Sciences Corporation	Canada	University						Industry	For-Profit organization		On-going	2013
ClinicalTrials.gov	NCT00221845		Y	Y	1		Heidelberg University	Germany	University						European Commission+ Industry	Both	I-FA	Completed	2005	2010	Yes	EC+Industry	Boehringer Ingelheim Stiftung; European Commission (Fifth Framework Programme, QLRT-2001-00908); Kuratorium fur Dialyse und Nierentransplantation, Neu-Isenburg; and the Baxter Extramural Grant Program.	C	NEJM	2009	59.558	11 to 60	2011	17	10.1056/NEJMoa0902066
ClinicalTrials.gov	NCT02876133		Y	Y	1		Hospital Beatriz Ângelo	Portugal	Hospital						Public Institution - Hospital	Sponsor	NPO	On-going	2016
ClinicalTrials.gov	NCT02067065		Y	Y	1		Hospital Beatriz Ângelo	Portugal	Hospital						Public Institution - Hospital	Sponsor	NPO	Completed	2014	2015	Yes	NA	not indicated	C - Not Mentioned	Endoscopy	2016	5.634	0 to 10	2018	not considered	10.1055/s-0042-105560
ISRCTN	ISRCTN58800729		Y	Y	1		Hospital da Cruz Vermelha (Portugal)	Portugal	Hospital						Industry + Private Institution- Hospital	Both	NPO	Completed	2005	2008	Yes	Industry + Hospital	Merk+ Cruz Vermelha	C	Trials	2008	1.859	0 to 10	2010	0	10.1186/1745-6215-9-44
ClinicalTrials.gov	NCT02502877		Y	Y	1		Hospital da Luz, Portugal	Portugal	Hospital						Private Institution - Hospital	Sponsor	OTHERS	Completed	2015	2016	No
ClinicalTrials.gov	NCT02313961		Y	Y	1		Hospital de Braga	Portugal	Hospital						Publication (European Commission + FCT)	Non-for-profit organization	NPO	On-going	2013
ClinicalTrials.gov	NCT02224495		Y	Y	1		Hospital de Gaia	Portugal	Hospital						Publication (European Commission + FCT)	Non-for-profit organization	NPO	Completed	2011	2013	yes	I-FA+N-FA	EC + FCT	Add	Trials	2015	1.69	0 to 10	2017	31	doi: 10.1186/s13063-015-0612-6.
ISRCTN	ISRCTN34532248		Y	Y	1		Hospital Geral Krankenhaus Merheim	Germany	Hospital						Industry	For-Profit organization		Completed	2005	2012	No
ISRCTN	ISRCTN89432944		Y	Y	1		Hospital Padre Americo (Portugal)	Portugal	Hospital						Public Institution - University	Non-for-profit organization	IPO	Completed	2007	2007	Yes	No external funding	No external funding	NC	Critical Care	2010	4.95	0 to 10	2012	8	10.1186/cc8844
ClinicalTrials.gov	NCT02074644	PAE-01-2013	Y	Y	1		Hospital St. Louis, Lisbon	Portugal	Hospital						Private Institution - Hospital	Sponsor	OTHERS	On-going	2014
ClinicalTrials.gov	NCT02631330		Y	Y	1		Hospital Universitarios de la Ribera	Spain	Hospital						Public Institution - University	Sponsor	IPO	On-going	2015
EU-CTR	2009-017903-28*	NCT01208766 (not mention Pt)	Y/Y - linked	Y/N*	2	A	HOVON Foundation	The Netherlands	Foundation	HOVON foundation	Stichting Hemato-Oncologie voor Volwassenen Nederland;GIMEMA; DSMM; NMSG; Central	na	na	N	Foundation	Non-for-profit organization	OTHERS	On-going	2010
EU-CTR	2009-012807-25		N	Y	1		IIL INTERGRUPPO ITALIANO LINFOMI ONLUS	Italy	Disease specific organization						ni	Not indicated		On-going	2010
EU-CTR	2013-000643-40	NCT02065713	Y/Y - not linked	Y/Y	2	C	IMM	Portugal	Research Institute	Merck	Merck	na	na	Y	Industry	For-Profit organization		On-going	2014
EU-CTR	2010-020302-15		N	Y	1		IMM	Portugal	Research Institute						Public Institution - Research Institute	Non-for-profit organization	NPO	On-going	2011
ISRCTN	ISRCTN25644448		Y	Y	1		IMM	Portugal	Research Institute						Industry+Public Institution-Hospital	Both	NPO	On-going	2014
ClinicalTrials.gov	NCT02385019		Y	Y	1		IMM	Portugal	Research Institute						we know (European Commission)	Non-for-profit organization	NPO	On-going	2015
ClinicalTrials.gov	NCT02053038		Y	Y	1		Imperial College London	UK	University						University	Sponsor	IPO	On-going	2014
EU-CTR	2009-015113-44	NCT01066962	Y/Y - linked	Y/Y	2	B	Inserm. Agence Nationale de Recherches Sur le Sida - ANSR	France	Research Institute	n.i.	NEAT - European AIDS Treatment Network	na	na	N	Government - France	Non-for-profit organization	IPO	Completed	2010	2013	Yes	Grants+Industry	Instituto Superiore di Sanita-Rome by the European Commission+Ministerio de Sanidad y Asuntos Sociales de España+ (drugs: Gilead Sciences+Janssen+Merck)+ Sponsor	NC	Lancet	2014	44.002	11 to 60	2016	13	10.1016/S0140-6736(14)61170-3
ClinicalTrials.gov	NCT00782171		Y	Y	1		Institut Straumann AG	Switzerland	Research Institute						Reserach Institure	Sponsor	IPO	Completed	2004	2010	No		European Commission+Ministerio de Sanidad
ClinicalTrials.gov	NCT01961635		Y	Y	1		Instituto de Implantologia	Portugal	Other						Private Org	Sponsor	OTHERS	On-going	2016				y Asuntos Sociales de España+ (drugs: Gilead Sciences+Janssen+Merck)+ Sponsor
ClinicalTrials.gov	NCT01963754		Y	Y	1		Instituto de Implantologia	Portugal	Other						Private Org	Sponsor	OTHERS	Unkown	2014
ClinicalTrials.gov	NCT01970826		Y	Y	1		Instituto de Implantologia	Portugal	Other						Provate Org	Sponsor	OTHERS	Unkown	2014
ClinicalTrials.gov	NCT01939171	NCT sugere EU-CTR, mas não está registado em Pt	N	Y	1		Instituto de Investigación Hospital Universitario La Paz	Bolivia	Research Institute						Public Institution - Hospital	Non-for-profit organization	NPO	Completed	2010	2012	No
EU-CTR	2010-021396-81		N	Y	1		INSTITUTO DE INVESTIGACIÓN SANITARIA LA FE DE VALENCIA	Spain	Research Institute						Public Institution - Research Institute	Non-for-profit organization	IPO	On-going	2011
EU-CTR	2005-001324-36		N	Y	1		Instituto Oftalmológico de Alicante (VISSUM)	Spain	Research Institute						ni	Not indicated		Completed	2005	na	No
ISRCTN	ISRCTN02221709		Y	Y	1		Instituto Superior de Psicologia Aplicada (ISPA) (Portugal)	Portugal	University						ni	Not indicated		Completed	2012	2016	Yes	Academic grant- BD	PhD Scholarship	C	BMC Women's Health	2016	1.353	0 to 10	2018	not considered	10.1186/s12905-016-0302-x
ClinicalTrials.gov	NCT02308085		Y	Y	1		International Breast Cancer Study Group	Switzerland	Disease specific organization						Disease Specific Organization	Non-for-profit organization	DIS_SO	On-going	2014
EU-CTR	2012-003058-10		N	Y	1		International Breast Cancer Study Group (IBCSG)	Switzerland	Disease specific organization						Industry	For-Profit organization		On-going	2013
ClinicalTrials.gov	NCT01599559		N	Y	1		International Extranodal Lymphoma Study Group (IELSG)	Switzerland	Disease specific organization						Disease Specific Org	Sponsor	DIS_SO	On-going	2011
ClinicalTrials.gov	NCT02357303		Y	Y	1		IPO-C	Portugal	Hospital						Public Institution - Hospital	Sponsor	NPO	Completed	2015	2016	Yes	Disease Specific Organization	Disease Specific Organization Portuguese Society of Digestive Endoscopy (Sociedade Portuguesa de Endoscopia Digestiva – SPED) for the research grant	Add	Endoscopy	2017	5.634	0 to 10	2019	not considered	10.1055/s-0042-119034
ClinicalTrials.gov	NCT02955901		Y	Y	1		IPO-C	Portugal	Hospital						Public Institution - Hospital	Sponsor	NPO	On-going	2017												10.1055/s-0042-119034
ANZCTR	ACTRN12616000697482		Y	Y	1		IPO-L	Portugal	Hospital						Public Institution - Hospital	Non-for-profit organization	NPO	On-going	2016
EU-CTR	2012-001502-26		Y	Y	1		IPO-L	Portugal	Hospital						Public Institution- Hospital + Disease Specific Organization	Non-for-profit organization	DIS_SO	Completed	2012	2015	No
EU-CTR	2007-007257-31		N	Y	1		IPO-L	Portugal	Hospital						ni	Not indicated		Completed	2008	2010	No
EU-CTR	2013-001203-36		N	Y	1		IPO-P	Portugal	Hospital						Industry	For-Profit organization		On-going	2014
ClinicalTrials.gov	NCT01547208		Y	Y	1		IRCCS San Raffaele	Italy	Hospital						Public Institution- Hospital	Sponsor	IPO	On-going	2012
ISRCTN	ISRCTN70763996	SFRH/BD/47579/2008	Y	Y	1		ISPA	Portugal	University						University - Netherlands	Non-for-profit organization	IPO	Completed	2011	2013	Yes	NOT (No funding)	PhD Scholarship	NC	Int.J. Behav. Med	2015	1.846	0 to 10	2017	0	10.1007/s12529-014-9432-4
EU-CTR	2012-002535-28		N	Y	1		Joint Research & Development Office (Barts and The London School of Medicine & Dentistry)	UK	University						Public Institution - University	Non-for-profit organization	IPO	On-going	2013
ISRCTN	ISRCTN01096902	NCT00735137	Y/Y - linked	Y/Y	2	A	King's College Hospital NHS Foundation Trust (UK)	UK	Foundation	na	n.i.	Fetal Medicine Foundation (UK)	na	N	Foundation	Non-for-profit organization	DIS_SO	Completed	2008	2008	Yes	Disease specific organisation	Fetal Medicine Foundation (UK)	C	NEJM	2016	59.558	11 to 60	2018	not considered	10.1056/NEJMoa1511014.
ClinicalTrials.gov	NCT00315770		N	Y	1		Landspitali University Hospital	Iceland	University						European Commission + Public Institution	Non-for-profit organization	I-FA	Unkown	2004
EU-CTR	2004-001756-36		Y	Y	1		LYSA (The Lymphoma Study Association)	France	Disease specific organization						ni	Not indicated		On-going	2005
EU-CTR	2011-002792-42		N	Y	1		LYSARC	France	Disease specific organization						Industry	For-Profit organization		On-going	2012
EU-CTR	2013-000450-22		Y	Y	1		LYSARC	France	Disease specific organization						Industry	For-Profit organization		On-going	2014
EU-CTR	2008-008202-52	NCT01122472; ACTRN12611000085976	Y/Y/N - not linked	Y/Y/Y	3	A	LYSARC	France	Disease specific organization	Celgene Corporation	n.i.	na	GELA, Australasian Leukaemia and Lymphoma Group, Celgene Corporation	N	Industry+ Disease Specific Organization	Both	DIS_SO	On-going	2009
EU-CTR	2012-001580-68	NCT01796002	Y/Y - not linked	Y/Y	2	C	LYSARC	France	Disease specific organization	Celgene corporation	n.i.	na	na	N	Industry	For-Profit organization		On-going	2013
EU-CTR	2012-002542-20	NCT01865110	Y/Y - not linked	Y/Y	2	C	LYSARC	France	Disease specific organization	Celgene & Roche	n.i.	na	na	N	Industry	For-Profit organization		On-going	2014
ClinicalTrials.gov	NCT01774474		N	Y	1		Maastricht University Medical Center	The Netherlands	University						Disease Specific Organization	Non-for-profit organization	DIS_SO	Completed	2013	2016	No
ISRCTN	ISRCTN14411440		Y	Y	1		Maria Josefa Recio Foundation - Institute of Psychiatric Research (Spain)	Spain	Foundation						Government - Spain	Non-for-profit organization	I-FA	Completed	2009	2010	Yes	Academic grant	Academic grant	C	Alzheimer Disease & Associated Disorders	2014	2.53	0 to 10	2016	1	10.1097/WAD.0000000000000003
ClinicalTrials.gov	NCT02998333		Y	Y	1		Memorial Sloan Kettering Cancer Center	The Netherlands	Disease specific organization						Industry+Public Institution-Hospital	Both	NPO	On-going	2017
ClinicalTrials.gov	NCT01223248		Y	Y	1		Memorial Sloan Kettering Cancer Center	USA	Disease specific organization						Public Institution - University	Non-for-profit organization	IPO	On-going	2010
EU-CTR	2014-005172-28		Y	Y	1		Montreal Heart Institute	Canada	Disease specific organization						Public Institution - Hospital	Non-for-profit organization	IPO	On-going	2016
ANZCTR	ACTRN12605000005651	VITATOPS	N	Y	1		National Health & Medical Research Council	Australia	Other						Government + Disease Specific organization	Non-for-profit organization	I-FA	On-going	2004
ANZCTR	ACTRN12613000241730	SMARRT	Y	Y	1		National Health and Medical Research Council	Australia	Other						Government - Australia	Non-for-profit organization	I-FA	On-going	2014
EU-CTR	2005-001490-95	NCT00110812	N/Y	Y/Y	2	C	National Institute of Allergy and Infectious Diseases (NIAID)	USA	Disease specific organization	ni	n.i.	na	na	Y	Industry	For-Profit organization		On-going	2005
ClinicalTrials.gov	NCT01471522	1U01HL105907 ( US NIH Grant/Contract Award Number )	Y	Y	1		New York University School of Medicine	USA	University						Government - USA + Universities	Non-for-profit organization	I-FA	On-going	2012
ISRCTN	ISRCTN43067816		Y	Y	1		Nursing School of Coimbra (Escola Superior de Enfermagem de Coimbra) (Portugal)	Portugal	University						Public Institution - Hospital	Non-for-profit organization	NPO	Completed	2010	2010	Yes	NA	No funding	NC - Not Mentioned	Jornal de Pediatria	2013	2.062	0 to 10	2015	1	10.1016/j.jped.2013.03.022
ISRCTN	ISRCTN73259137		Y	Y	1		Nursing School of Coimbra (Escola Superior de Enfermagem de Coimbra) (Portugal)	Portugal	University						FCT	Non-for-profit organization	N-FA	Completed	2007	2008	No										http://repositorio.ul.pt/handle/10451/2406?locale=en
ISRCTN	ISRCTN30784467		Y	Y	1		Oxford Brookes University (UK)	UK	University						Government - UK	Non-for-profit organization	DIS_SO	Completed	2007	2008	Yes	Disease specific organisation	Alcohol Education and Research Council (AERC) (UK); European Research Advisory Board (ERAB) (Belgium)	C	Plos One	2012	3.057	0 to 10	2014	7	10.1371/journal.pone.0044120
EU-CTR	2009-013648-35		N	Y	1		PENTA Foundation	Italy	Foundation						ni	Not indicated		Completed	2010	2013	Yes	Disease specific organisation+Industry	European Union Seventh Framework Program (FP7/2007–2013) with financial support for this trial from Abbott Laboratories that supplied LPV/r tablets to sites in Germany, Spain, France and Thailand.	Add	The Pediatrics Infectious Disease Journal	2014	2.587	0 to 10	2016	1	10.1097/INF.0000000000000014
ANZCTR	ACTRN12616001365459		Y	Y	1		Polytechnic Institute of Leiria- Research Centre for Human Movement Sciences (CIMH)	Portugal	University						Public Institution - University	Non-for-profit organization	NPO	Completed	2014	na	No
ClinicalTrials.gov	NCT02588963		Y	Y	1		Polytechnic Institute of Porto	Portugal	University						Public Institution - University	Non-for-profit organization	NPO	On-going	2015
ISRCTN	ISRCTN14574075		Y	Y	1		Poole Hospital NHS Foundation Trust	UK	Foundation						Industry	For-Profit organization		On-going	2016
EU-CTR	2006-000537-35	NCT00561054 - NOT@ICTRP	N/N	Y/Y	2	B	Portuguese Lung Cancer Study Group	Portugal	Disease specific organization	n.i.	n.i.	na	na	Y	Disease Specific Org.	Sponsor	DIS_SO	Completed	2006	2010	No
EU-CTR	2014-001205-41	VIPER	Y	Y	1		Portuguese Society of Cardiology	Portugal	Disease specific organization						Industry	For-Profit organization		On-going	2015
ClinicalTrials.gov	NCT02173860	SAVE-IT	Y	Y	1		Portuguese Society of Cardiology	Portugal	Disease specific organization						Industry+Disease Specific Organization	Both	DIS_SO	On-going	2014
ClinicalTrials.gov	NCT00078832		N	Y	1		Queen Mary University of London	UK	University						University	Sponsor	IPO	On-going	2004
EU-CTR	2013-002403-34		N	Y	1		Queen Mary, University of London	UK	University						Industry	For-Profit organization		On-going	2013
EU-CTR	2008-006439-12	NCT00867048	Y/Y - linked	Y/Y	2	A	Regents of the University of Minnesota	USA	University	n.i.	16 Non-for-profit + 6 For-profit	na	na	N	Industry+ Government+ Disease Specific Organization	Both	DIS_SO	On-going	2009
ISRCTN	ISRCTN65076841		Y	Y	1		Reumafonds (Dutch Rheumatoid Arthritis Foundation) (The Netherlands)	The Netherlands	Foundation						Disease Specific Organization	Non-for-profit organization	DIS_SO	Completed	2005	2007	Yes	Disease specific organisation	Reumafonds (Dutch Rheumatoid Arthritis Foundation) (The Netherlands)	C	BMC Musculoskeletal Disorders	2006	1.684	0 to 10	2008	1	10.1186/1471-2474-7-14
ICTRP	2005-001059-39		Y	N	1		Schering-Plough Research Institute	USA	Research Institute						Industry	For-Profit organization		Completed	2005	2014	Yes	Industry		C	American Heart Journal	2014	4.332	0 to 10	2016	13	/10.1016/j.ahj.2014.05.004
ISRCTN	ISRCTN11928413		Y	Y	1		Section of Neonatology of the Portuguese Society of Paediatrics	Portugal	Disease specific organization						Disease Specific Organization	Non-for-profit organization	DIS_SO	Completed	2010	2014	No
EU-CTR	2012-000394-23	NCT01669252	Y/N	Y/Y	2	B	SOLTI	Spain	Disease specific organization	EISAI	ESAI	na	na	Y	Industry	For-Profit organization		Completed	2012	2015	No
ClinicalTrials.gov	NCT01704716	SIOPEN	Y	Y	1		St. Anna Kinderkrebsforschung	Austria	Research Institute						Government UK + Public Institutions	Non-for-profit organization	I-FA	On-going	2004		In the paper published only government and institutions were funding				Seen in the Paper. Portuguese investigators are not in the publication						DOI: 10.1200/JCO.2013.53.3604
ISRCTN	ISRCTN73916115*	NCT00716079; ACTRN12608000362392	N/Y/N	Y/Y/N*	3	B	The George Institute for Global Health	Australia	Research Institute	na	NHMRC	NHMRC	NHMRC	Y	Government - Australia	Non-for-profit organization	I-FA	Completed	2008	2012	Yes	International funding agency - Government body	Australian National Health Service and Medical Research Council	C	International Journal of Stroke	2010	3.044	0 to 10	2012	6	10.1111/j.1747-4949.2010.00415.x
ANZCTR	ACTRN12611000236998	ENCHANTED, ISRCTN82387104*, NCT01422616	Y/N/N	Y/Y/N*	3	B	The George Institute for Global Health	Australia	Research Institute	na	National Health and Medical Research Council, Australia; The Stroke Association, United Kingdom; Conselho Nacional de Desenvolvimento Científico e Tecnológico; Takeda	Australian National Health Service and Medical Research Council (Australia)	National Health and Medical Research Council (NHMRC)	N	Government - Australia	Non-for-profit organization	I-FA	On-going	2011
EU-CTR	2004-000238-36*	ISRCTN25765518 - IST-3	N/N	Y/N*	2	A	The University of Edinburgh & Lothian Health Board	UK	University	n.i.	n.a.	The Health Foundation (UK); Medical Research Council (MRC)/National Institutes of Health Research (NIHR); Stroke Association; AFA Försäkring; Norges Forskningsråd; The Heart Foundation (Australia)		N	Government - several countries	Non-for-profit organization	I-FA	On-going	2005
ClinicalTrials.gov	NCT00976638		Y	Y	1		UMC Utrecht	The Netherlands	University						University	Sponsor	IPO	Completed	2008	2011	Yes	European Commission		NC	The Lancet	2014	44.002	11 to 60	2016	30	10.1016/S1473-3099(13)70295-0
EU-CTR	2007-001520-12		N	Y	1		Unidade de Investigação em Saúde Mental e Psiquiatria do Centro Hospitalar Conde de Ferreira	Portugal	Hospital						ni	Not indicated		Completed	2008	2008	No
ISRCTN	ISRCTN88405328		Y	Y	1		Univ Leeds, UK	UK	University						European Commission	Non-for-profit organization	I-FA	On-going	2015
ClinicalTrials.gov	NCT02857803		Y	Y	1		Universidade da Madeira	Portugal	University						Public Institution-Univ	Sponsor	NPO	On-going	2016
ClinicalTrials.gov	NCT02539914		Y	Y	1		Universidade da Madeira	Portugal	University						Public Institution-Univ	Sponsor	NPO	Completed	2015	2016	No
ANZCTR	ACTRN12612000301864	ACTRN12611001164987, ProBalance,	Y	Y	1		Universidade da Madeira	Portugal	University						Agência Regional para o Desenvolvimento da Investigação, Tecnologia e Inovação + others	Non-for-profit organization	N-FA	Completed	2012	na	No
ClinicalTrials.gov	NCT02122614	SFRH/BD/81328/2011	Y	Y	1		Universidade de Aveiro	Portugal	University						Public Institution- University	Sponsor	NPO	Completed	2014	2015	Yes	NOT (No funding)	no funding	NC	Chronic Respiratory Disease	2016	1.818	0 to 10	2018	not considered	10.1177/1479972315619574
ClinicalTrials.gov	NCT02048306	RIPD/CIF/109502/2009	Y	Y	1		Universidade de Aveiro	Portugal	University						FCT	Non-for-profit organization	N-FA	Completed	2012	2013	Yes	Government body- Funding Agency	FCT	C	Chest	2015	5.94	0 to 10	2017	4	10.1378/chest.14-1488
ClinicalTrials.gov	NCT02053870	PTDC/SAU-BEB/101943/2008	Y	Y	1		Universidade de Aveiro	Portugal	University						FCT	Non-for-profit organization	N-FA	Completed	2009	2013	Yes	Government body- Funding agency	FCT	C	Physiotherapy	2016	1.814	0 to 10	2018	not considered	10.1016/j.physio.2015.03.3723
ClinicalTrials.gov	NCT02490826		Y	Y	1		Universidade de Aveiro	Portugal	University						Public Institution- University	Sponsor	NPO	On-going	2014
ClinicalTrials.gov	NCT03029260		Y	Y	1		Universidade de Aveiro	Portugal	University						Public Institution- University	Sponsor	NPO	On-going	2017
ClinicalTrials.gov	NCT02050711	SFRH/BD/84665/2012	Y	Y	1		Universidade de Aveiro	Portugal	University						Public Institution- University	Sponsor	NPO	Unkown	2013
ISRCTN	ISRCTN75243042		Y	Y	1		Universidade de Aveiro	Portugal	University						FCT	Non-for-profit organization	N-FA	Completed	2009	2013	No
ClinicalTrials.gov	NCT02746835		Y	Y	1		Universidade de Aveiro	Portugal	University						Public Institution - Hospital	Non-for-profit organization	NPO	Completed	2015	2016	No
ISRCTN	ISRCTN87835631		Y	Y	1		Universidade de Coimbra	Portugal	University						Public Institution - University	Non-for-profit organization	NPO	On-going	2011
ClinicalTrials.gov	NCT02553005		Y	Y	1		Universidade de Coimbra	Portugal	University						Public Institution- University	Sponsor	NPO	On-going	2015
ISRCTN	ISRCTN93104189		Y	Y	1		Universidade de Évora	Portugal	University						Public Institution - University	Non-for-profit organization	NPO	Completed	2008	2008	Yes	NA	No Funding	NC - Not Mentioned	The Journal of Sports Medicine and Physical Fitness	2016	1.215	0 to 10	2018	not considered	NA
ISRCTN	ISRCTN37081460		Y	Y	1		Universidade de Évora	Portugal	University						Public Institution - University	Non-for-profit organization	NPO	Completed	2012	2012	Yes	Funding agency - Government body	Junta de Extremadura – European Regional Development Funds (ERDF)	NC	Complementary Therapies in Clinical Practice	2017	1.436	0 to 10	2019	not considered	10.1016/j.ctcp.2017.05.013
ClinicalTrials.gov	NCT01769807	(Publication has funds)	Y	Y	1		Universidade de Lisboa	Portugal	University						Public Institution- University	Sponsor	NPO	Completed	2004	2008	Yes	Funding Agency - Government body	Feder/POCI/FCT/Centro de Estudos de Doenças Crónicas.	Add	BMC Pulmonary Medicine	2013	2.329	0 to 10	2015	6	10.1186/1471-2466-13-13
ISRCTN	ISRCTN34354086		Y	Y	1		Universidade de Lisboa	Portugal	University						Public Institution - University	Non-for-profit organization	NPO	Completed	2010	2013	Yes	Disease specific organisation	No funding	NC	Journal of Palliative Medicine	2014	2.023	0 to 10	2016	3	10.1089/jpm.2013.0567
ISRCTN	ISRCTN68970559		Y	Y	1		Universidade de Lisboa	Portugal	University						Public Institution - University	Non-for-profit organization	NPO	Completed	2007	2008	Yes	NA	No funding	NC - Not Mentioned	Oral Diseases	2009	2	0 to 10	2011	1	10.1111/j.1601-0825.2009.01513.x
ClinicalTrials.gov	NCT00353665		Y	Y	1		Universidade de Lisboa	Portugal	University						Industry	For-Profit organization		Completed	2005	2009	Yes	Industry	Industry	C	Amyotrophic Lateral Sclerosis	2010	3.06	0 to 10	2012	1	10.3109/17482968.2010.498521
ClinicalTrials.gov	NCT02413151	PTDC/DES/120249/2010	Y	Y	1		Universidade de Lisboa	Portugal	University						FCT	Non-for-profit organization	N-FA	Unkown	2012
ClinicalTrials.gov	NCT02468882		Y	Y	1		Universidade de Lisboa	Portugal	University						Public Institution- University	Sponsor	NPO	On-going	2014
ClinicalTrials.gov	NCT02899481		Y	Y	1		Universidade de Lisboa	Portugal	University						Public Institution- University	Sponsor	NPO	On-going	2016
ClinicalTrials.gov	NCT02941770	1332/CC1942016	Y	Y	1		Universidade de Lisboa	Portugal	University						Public Institution- University	Sponsor	NPO	On-going	2016
ISRCTN	ISRCTN79212143		Y	Y	1		Universidade de Lisboa	Portugal	University						Public Institution - University	Non-for-profit organization	NPO	Completed	2014	2014	No
ClinicalTrials.gov	NCT01236950		Y	Y	1		Universidade de Lisboa	Portugal	University						Private Institution - University	Non-for-profit organization	OTHERS	Completed	2007	2008	No
ClinicalTrials.gov	NCT01236963		Y	Y	1		Universidade de Lisboa	Portugal	University						Private Institution - University	Non-for-profit organization	OTHERS	Completed	2007	2008	No
ClinicalTrials.gov	NCT01477294		Y	Y	1		Universidade de Lisboa	Portugal	University						Public Institution- University	Sponsor	NPO	Completed	2010	2010	Yes	Disease specific organisation	Portuguese Institute of Hydration and Health	Add	Plos One	2013	3.057	0 to 10	2015	2	10.1371/journal.pone.0068936
ISRCTN	ISRCTN76013675	PTDC/DES/108372/2008	Y	Y	1		Universidade de Lisboa	Portugal	University						FCT	Non-for-profit organization	N-FA	Completed	2010	2013	Yes	Government body	FCT	C	Int J Obes (Lond)	2016	5.337	0 to 10	2018	not considered	10.1038/ijo.2015.168
ClinicalTrials.gov	NCT01832545		Y	Y	1		Universidade de Lisboa	Portugal	University						Public Institution- University	Sponsor	NPO	Completed	2011	2012	Yes	NA	not accessible	C - Not Mentioned	BMC Musculoskeletal Disorders	2013	1.684	0 to 10	2015	0	10.1186/1471-2474-14-320.
ClinicalTrials.gov	NCT02007681		Y	Y	1		Universidade de Lisboa	Portugal	University						Public Institution- University	Sponsor	NPO	Completed	2013	2013	Yes	No funding	No funding	C	Trials	2015	1.859	0 to 10	2017	4	10.1186/s13063-015-1015-4.
ClinicalTrials.gov	NCT02377037		Y	Y	1		Universidade de Lisboa	Portugal	University						Public Institution- University	Sponsor	NPO	Completed	2014	2015	Yes	No funding	No funding	C	European Journal of Applied Physiology	2016	2.328	0 to 10	2018	not considered	10.1007/s00421-015-3279-5
ClinicalTrials.gov	NCT02190331	SFRH/BD/77633/2011	Y	Y	1		Universidade de Lisboa	Portugal	University						Public Institution- University	Sponsor	NPO	Completed	2012	2013	Yes	No funding	No funding	C	Manual Therapy	2016	1.869	0 to 10	2018	not considered	10.1016/j.math.2015.05.001
ClinicalTrials.gov	NCT01899482	SFRH/BD/62673/2009	Y	Y	1		Universidade de Lisboa	Portugal	University						Public Institution- University	Sponsor	NPO	Completed	2013	2013	Yes	No funding	No funding	C	Phlebology	2014	1.413	0 to 10	2016	1	10.1177/0268355513502787
ClinicalTrials.gov	NCT00513084	FCT-POCI/DES/57705/2004	Y	Y	1		Universidade de Lisboa	Portugal	University						FCT	Non-for-profit organization	N-FA	Unkown	2007
ClinicalTrials.gov	NCT03031951		Y	Y	1		Universidade de Lisboa	Portugal	University						Public Institution- University	Sponsor	NPO	On-going	2016
ANZCTR	ACTRN12616001432404		Y	Y	1		Universidade de Lisboa	Portugal	University						EEA Grants	Non-for-profit organization	I-FA	On-going	2016		No
ANZCTR	ACTRN12616000929404		Y	Y	1		Universidade de Lisboa	Portugal	University						Public Institution - University	Non-for-profit organization	NPO	Completed	2013	na	No
ClinicalTrials.gov	NCT02580123		N	Y	1		Universidade do Minho	Portugal	University						Public Institution- University	Sponsor	NPO	Completed	2012	2014	Yes	Government body- funding agency	FCT - Projeto PEst-OE/SAU/UI0617/2011.	C	Preventive Medicine	2013	3.434	0 to 10	2015	1	10.1016/j.ypmed.2013.02.027
ISRCTN	ISRCTN37668662	PTDC/MHC-PCL/4974/2012	Y	Y	1		Universidade do Minho	Portugal	University						FCT	Non-for-profit organization	N-FA	On-going	2015
ClinicalTrials.gov	NCT02988947		Y	Y	1		Universidade do Minho	Portugal	University						Public Institution - Hospital	Non-for-profit organization	NPO	On-going	2017		No
ClinicalTrials.gov	NCT02074501		Y	Y	1		Universidade do Minho	Portugal	University						Public Institution- University	Sponsor	NPO	Unkown	2014
ClinicalTrials.gov	NCT01397123	CNPD: 7613/2008	Y	Y	1		Universidade do Minho	Portugal	University						Public Institution - University	Non-for-profit organization	NPO	Completed	2007	2009	No
ClinicalTrials.gov	NCT01597817		Y	Y	1		Universidade do Porto	Portugal	University						Public Institution - University	Non-for-profit organization	OTHERS	Completed	2011	2012	Yes	No funding	No funding	NC	Plos One	2015	3.057	0 to 10	2017	1	10.1371/journal.pone.0142844
ClinicalTrials.gov	NCT02975856		Y	Y	1		Universidade do Porto	Portugal	University						Public Institution+ Private organization	Both	NPO	Completed	2015	2016	Yes	Funding agency - Government body	Funding agency - Government body	NC	Food and Function	2017	3.247	0 to 10	2019	not considered	10.1039/C7FO00329C
ICTRP	TCTR20150512001		Y	N	1		Universidade do Porto	Portugal	University						Public Institution - University	Non-for-profit organization	NPO	Completed	2013	2014	Yes	Brazil Funding agency - Government body	Brazilian Council for Research and Technological Development (CNPq) and Carlos Chagas Filho Foundation for the Research Support at the State of Rio de Janeiro (FAPERJ).	NC	Journal of Sports Sciences	2016	2.142	0 to 10	2018	not considered	10.1080/02640414.2015.1064150
ICTRP	ISRCTN42314164		Y	N	1		Universidade do Porto	Portugal	University						Public Institution -Research Institution	Non-for-profit organization	NPO	Completed	2009	2011	Yes	Funding Agencies+research institute (independence is well explained)		NC	Obstetrics & Gynecology	2017	5.426	0 to 10	2019	not considered	10.1097/AOG.0000000000001799
ClinicalTrials.gov	NCT02607761	PTDC/MHC-PSC/4195/2012	Y	Y	1		Universidade do Porto	Portugal	University						FCT	Non-for-profit organization	N-FA	Completed	2014	2016	Yes	Government body- Funding Agency	Government body- Funding Agency	C	The European Journal of Contraception & Reproductive Health Care	2017	1.627	0 to 10	2019	not considered	10.1080/13625187.2017.1288903
EU-CTR	2013-002269-21	FCT & NCT02017561	N/Y	Y/Y	2	C	Universidade do Porto	Portugal	University	FCT	CHVNG/E; Merck	na	na	N	FCT+Industry+Public Inst	Both	N-FA	On-going	2013
ClinicalTrials.gov	NCT02151279		Y	Y	1		Universidade do Porto	Portugal	University						Public Institution - University	Non-for-profit organization	NPO	Unkown	2014
ClinicalTrials.gov	NCT02405507		Y	Y	1		Universidade do Porto	Portugal	University						COMPETE	Non-for-profit organization	N-FA	On-going	2015
ClinicalTrials.gov	NCT02843048	PTDC/DTP-DES/0968/2014 ; POCI-01-0145-FEDER-016707	Y	Y	1		Universidade do Porto	Portugal	University						FCT + Public Institution-Hospital	Non-for-profit organization	N-FA	On-going	2016
ClinicalTrials.gov	NCT02934815	FPCEUP/BreastCancerCare	Y	Y	1		Universidade do Porto	Portugal	University						FCT+Disease Specific Organization+ Public Institutions-Hospital	Non-for-profit organization	N-FA	On-going	2015
ClinicalTrials.gov	NCT02814006		Y	Y	1		Universidade do Porto	Portugal	University						FCT	Non-for-profit organization	N-FA	On-going	2016
ClinicalTrials.gov	NCT02813993	SFRH/BD/103234/2014	Y	Y	1		Universidade do Porto	Portugal	University						Public Institution- University	Sponsor	NPO	On-going	2016
ClinicalTrials.gov	NCT02150915		Y	Y	1		Universidade do Porto	Portugal	University						Public Institution - University	Non-for-profit organization	NPO	Completed	2014	2014	No
ClinicalTrials.gov	NCT01432639	PTDC/DES/113753/2009	Y	Y	1		Universidade do Porto	Portugal	University						FCT	Non-for-profit organization	N-FA	Completed	2011	2012	No
ClinicalTrials.gov	NCT01502722		Y	Y	1		Universidade do Porto	Portugal	University						Public Institution- University	Sponsor	NPO	Completed	2012	2012	No
ClinicalTrials.gov	NCT01580943		Y	Y	1		Universidade do Porto	Portugal	University						Public Institution- University	Sponsor	NPO	Completed	2011	2012	No
ClinicalTrials.gov	NCT01771094	Nº30/CEUP/2011 and	Y	Y	1		Universidade do Porto	Portugal	University						Public Institution- University	Sponsor	NPO	Completed	2012	2012	No
ClinicalTrials.gov	NCT02027675	MERIIT project	Y	Y	1		Universidade do Porto	Portugal	University						Public Institution- University	Sponsor	NPO	Completed	2014	2014	No
ClinicalTrials.gov	NCT02099357		Y	Y	1		Universidade do Porto	Portugal	University						Public Institution- University	Sponsor	NPO	Completed	2014	2015	No
ClinicalTrials.gov	NCT02613715		Y	Y	1		Universidade do Porto	Portugal	University						Public Institution- Research Institute & Private organization	Both	NPO	Completed	2015	2015	No
ClinicalTrials.gov	NCT01555775	SFRH/BD/75276/2010	Y	Y	1		Universidade do Porto	Portugal	University						Public Institution- University	Sponsor	NPO	Completed	2012	2012	No
ClinicalTrials.gov	NCT02698371		Y	Y	1		Universidade Fernando Pessoa	Portugal	University						Private Institution- University	Sponsor	OTHERS	On-going	2015
ANZCTR	ACTRN12616000580471		Y	Y	1		Universidade Fernando Pessoa	Portugal	University						Public Institution - University	Non-for-profit organization	OTHERS	Completed	2016	na	No
EU-CTR	2006-006889-42		N	Y	1		Universidade Nova de Lisboa	Portugal	University						ni	Not indicated		Completed	2007	2011	Yes	Government body+Industry	NMS; Merck KGaA –supply drugs – No interference	Add	British Journal of Clinical Pharmacology	2017	3.83	0 to 10	2019	not considered	10.1111/bcp.13198
EU-CTR	2013-004406-25		Y	Y	1		Universidade Nova de Lisboa	Portugal	University						Industry	For-Profit organization		On-going	2014
ClinicalTrials.gov	NCT02280538	NOVA-FCM-Rheuma-2	Y	Y	1		Universidade Nova de Lisboa	Portugal	University						Public Institution- Hospital, UNiversity, Research Institution	Non-for-profit organization	NPO	On-going	2014
ClinicalTrials.gov	NCT02366117		N	Y	1		Universidade Nova de Lisboa	Portugal	University						Direção Geral da Saúde	Non-for-profit organization	NPO	Unkown	2012
ClinicalTrials.gov	NCT01984034		Y	Y	1		Universidade Nova de Lisboa	Portugal	University						Public Institution- University	Sponsor	NPO	Unkown	2013
ClinicalTrials.gov	NCT02492217		Y	Y	1		Universidade Nova de Lisboa	Portugal	University						Public Institution- University	Sponsor	NPO	On-going	2015
ClinicalTrials.gov	NCT01385319		Y	Y	1		Università degli Studi di Ferrara	Italy	University						Public Institution- University	Sponsor	IPO	On-going	2011
ClinicalTrials.gov	NCT02105610		Y	Y	1		Università Vita-Salute San Raffaele	Italy	University						Public Institution- University	Sponsor	IPO	On-going	2014
EU-CTR	2013-000337-13		Y	Y	1		Universitätsklinikum Erlangen	Germany	University						Industry	For-Profit organization		On-going	2013
ClinicalTrials.gov	NCT03036462	FAIR-HF2-DZHK5 ( Other Grant/Funding Number: Deutsches Zentrum für Herzkreislaufforschung )	Y	Y	1		Universitätsklinikum Hamburg-Eppendorf	Germany	University						Public Institution - University	Non-for-profit organization	IPO	On-going	2017
EU-CTR	2015-003146-75, ISRCTN65055502	NCT02599480	N/Y/N	Y/Y/Y	3	B	Université catholique de Louvain (UCL) - BETA3-LVH	Germany	University	EC	EC	EC	na	Y	European Commission	Non-for-profit organization	I-FA	On-going	2016
ICTRP	NCT02112435		Y	N	1		Université de Montréal	Canada	University						Public Institution -Univ + Hospitals	Non-for-profit organization	I-FA	On-going	2014
EU-CTR	2004-001496-20*	ISRCTN43372330, EU-20603, NCT00321633	N/N/N	Y/N*/Y	3	A	University College London	UK	University	n.i.	University College London Hospitals	Breakthrough Breast Cancer; Cancer Research UK	na	N	Disease Specific Organization	Non-for-profit organization	DIS_SO	On-going	2005
ClinicalTrials.gov	NCT02333175		Y	Y	1		University College, London	UK	University						Public Institution - Research Institutes, Hospitals, Universities	Non-for-profit organization	NPO	On-going	2014
ClinicalTrials.gov	NCT01764646		Y	Y	1		University de Genéve	Switzerland	University						Public Institution- University	Sponsor	IPO	On-going	2012
EU-CTR	2012-004873-14		Y	Y	1		University Eye Clinic Maastricht	The Netherlands	University						Industry + Disease Specific Organization	Both	DIS_SO	On-going	2013
EU-CTR	2012-000793-30	NCT01802814	Y/N	Y/Y	2	C	University Hospital of Berlin-FP7- Charité -	Germany	University	European Union-FP7	19 Non-for-profit organizations	na	na	N	European commission	Non-for-profit organization	I-FA	On-going	2014
EU-CTR	2012-001249-41	FP7	N	Y	1		University Hospital of Zurich and City Hospital Waid-FP7-	Switzerland	University						European Commission + Industry+ private organizations	Both	I-FA	On-going	2013
EU-CTR	2013-000506-37		N	y	1		University Hospital Ulm	Germany	University						Industry	For-Profit organization		Completed	2014	na	No
ISRCTN	ISRCTN57061190		Y	Y	1		University Hospitals NHS Foundation Trust (UK) - Cambridge	UK	Foundation						Government - UK	Non-for-profit organization	I-FA	Completed	2012	2015	No
ClinicalTrials.gov	NCT02845791		N	y	1		University Hospitals, Leicester	UK	University						Government + Disease Specific Organization+ Public Institutions-Hospital& University	Non-for-profit organization	NPO	On-going	2016
EU-CTR	2013-001657-28		N	y	1		University Medical Center of the Johannes Gutenberg University Mainz	Germany	University						Industry	For-Profit organization		On-going	2014
EU-CTR	2016-000068-40		Y	Y	1		University Medical Centre Hamburg-Eppendorf	Germany	University						Industry	For-Profit organization		On-going	2016
ClinicalTrials.gov	NCT00294658	NIH grant	N	y	1		University of Alabama at Birmingham	UK	University						Government - USA	Non-for-profit organization	I-FA	Completed	2006	2015	Yes	Disease specific organisation	National Institute of Neurological Disorders and Stroke and others	NC	NEJM	2016	59.558	11 to 60	2018	not considered	10.1056/NEJMoa1602489
ISRCTN	ISRCTN34555414		Y	Y	1		University of Edinburgh and NHS Lothian (UK)	UK	University						Disease Specific Organization	Non-for-profit organization	DIS_SO	On-going	2009
ClinicalTrials.gov	NCT01864265		N	y	1		University of Erlangen-Nürnberg Medical School	Germany	University						Public Institution- University	Sponsor	IPO	On-going	2013
ISRCTN	ISRCTN81935608	EuroFIT	Y	Y	1		University of Glasgow	Scotland	University						European Commission	Non-for-profit organization	I-FA	On-going	2013
EU-CTR	2011-000440-22	NCT01596114	Y/N	Y/Y	2	B	University of Heidelberg-European LeukemiaNet	Germany	University	European leukemiaNet; Nordic CML group	European LeukemiaNet	na	na	N	Disease Specific Organization	Non-for-profit organization	DIS_SO	On-going	2012
ClinicalTrials.gov	NCT00912613		N	y	1		University of Liverpool	UK	University						Public Institution - Hospital	Non-for-profit organization	NPO	Completed	2007	2008	No
ClinicalTrials.gov	NCT00136344		Y	Y	1		University of London	UK	University						Industry+ Disease Specific Organization	Both	DIS_SO	Completed	2004	2006	Yes	Industry+Disease Specific Organisation	The European Society of Cataract and Refractive Surgeons(ESCRS), Santen Gmbh	C	J CATARACT REFRACT SURG	2006	2.687	0 to 10	2008	3	10.1016/j.jcrs.2006.02.021
ClinicalTrials.gov	NCT00883402		N	y	1		University of Oxford	UK	University						Foundation + University + Government	Non-for-profit organization	OTHERS	On-going	2008
ISRCTN	ISRCTN46280267*	NCT00974883	N/N	Y/N*	2	A	University of Oxford (UK)	UK	University	na	8 Non-for-Profit Organizations	Health Technology Assessment Programme	na	N	Government - UK	Non-for-profit organization	I-FA	Completed	2010	2014	Yes	Funding agency - Government body	HTA, Oxfordshire Health Research Services Committee	C	RMD Open	2017	NA	NA	2019	not considered	10.1136/rmdopen-2016-000353
ISRCTN	ISRCTN19652633*	NCT00003016	N/N	Y/N*	2	B	University of Oxford (UK)	UK	University	na	ni	Cancer Research UK; Medical Research Council; AstraZeneca* (UK); US Army Breast Cancer Research Program (USA)	na	N	Industry+Government- UK + Disease Specific Organization	Both	I-FA	Completed	2004	2015	Yes	Government body+Industry+Disease Specific Organisation	Cancer Research UK, UK Medical Research Council, AstraZeneca UK, US Army, EU-Biomed.	C	The Lancet	2013	44.002	11 to 60	2015	142	10.1016/S0140-6736(12)61963-1
ISRCTN	ISRCTN33698297		Y	Y	1		University of Porto - Medical School	Portugal	University						ni	Not indicated		Completed	2007	2009	Yes	Disease specific organisation+Government body	Consortium for Biomedical Research in Epidemiology and Public Health	Add	Drug Safety	2012	3.206	0 to 10	2014	0	10.1007/BF03261962
ClinicalTrials.gov	NCT02150031		Y	Y	1		University of Santiago de Compostela	Spain	University						(Publication) Government - Spain	Sponsor	IPO	Completed	2010	2012	Yes	Government body	Carlos III Institute of Health; European Regional Development Fund	Add	Plos One	2015	3.057	0 to 10	2017	2	10.1371/journal.pone.0124249
ISRCTN	ISRCTN45894687		Y	Y	1		University of Santiago de Compostela	Spain	University						Government - PRODEP	Non-for-profit organization	N-FA	Completed	2007	2009	Yes	Government body	PRODEP	C	Drug Safety	2008	3.206	0 to 10	2010	7	10.2165/00002018-200831040-00007
ClinicalTrials.gov	NCT02197351		Y	Y	1		University of Southern California	USA	University						Public Institution - University	Non-for-profit organization	NPO	On-going	2014
ClinicalTrials.gov	NCT01874132		Y	Y	1		University of Trás-os-Montes and Alto Douro	Portugal	University						Public Institution- University	Sponsor	NPO	Completed	2011	2014	Yes	NA	Not indicated	C - Not Mentioned	International Journal of Sports Medicine	2014	2.084	0 to 10	2016	0	10.1055/s-0034-1374639
ClinicalTrials.gov	NCT02631902	ISRCTN09240628	Y/Y - Not linked	Y/Y	2	C	University of Trás-os-Montes and Alto Douro	Portugal	University	na	ni	FCT (BD)	na	N	Fundos Europeus + BD (FCT)	Non-for-profit organization	I-FA	On-going	2015
ClinicalTrials.gov	NCT01788020	2013-000506-37	N/N	Y/Y	2	B	University of Ulm	Germany	University	Johnson & Johnson; Roche Pharma AG	ni	na	na	N	INDUSTRY (only at EU-CTR)	For-Profit organization		On-going	2013
ClinicalTrials.gov	NCT01745263	DO-HEALTH- FP7	Y	Y	1		University of Zurich	Switzerland	University						European Commission	Non-for-profit organization	I-FA	On-going	2012
EU-CTR	2015-002729-21	NCT02585258	N/Y	Y/Y	2	B	VU University Medical Center	The Netherlands	University	EC	EC	na	na	Y	European Commission	Non-for-profit organization	I-FA	On-going	2016
ClinicalTrials.gov	NCT02995681		Y	Y	1		West Park Healthcare Centre	Canada	Foundation						Public Institution - University	Non-for-profit organization	NPO	On-going	2017
